# Supplementary material
Source: Springer Nature journal article supplement (https://www.springermedizin.de/resource/supplementary/13058_2013_3369_MOESM14_ESM.pdf/9703970)

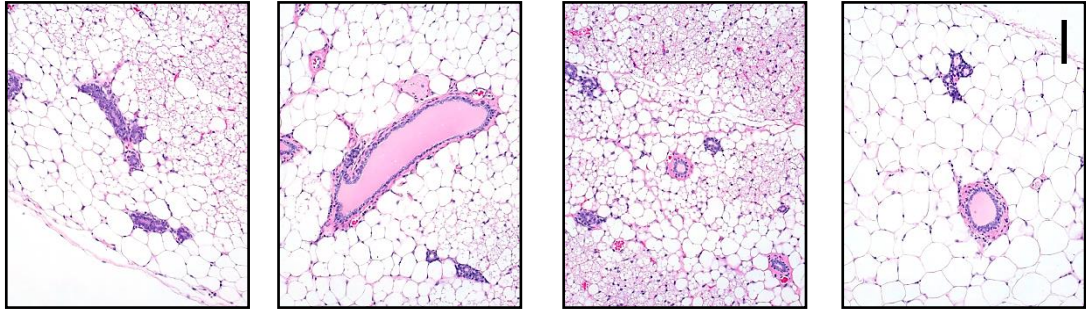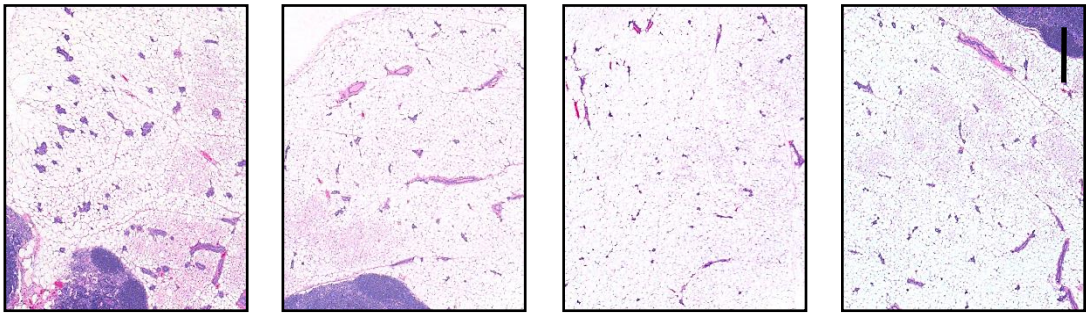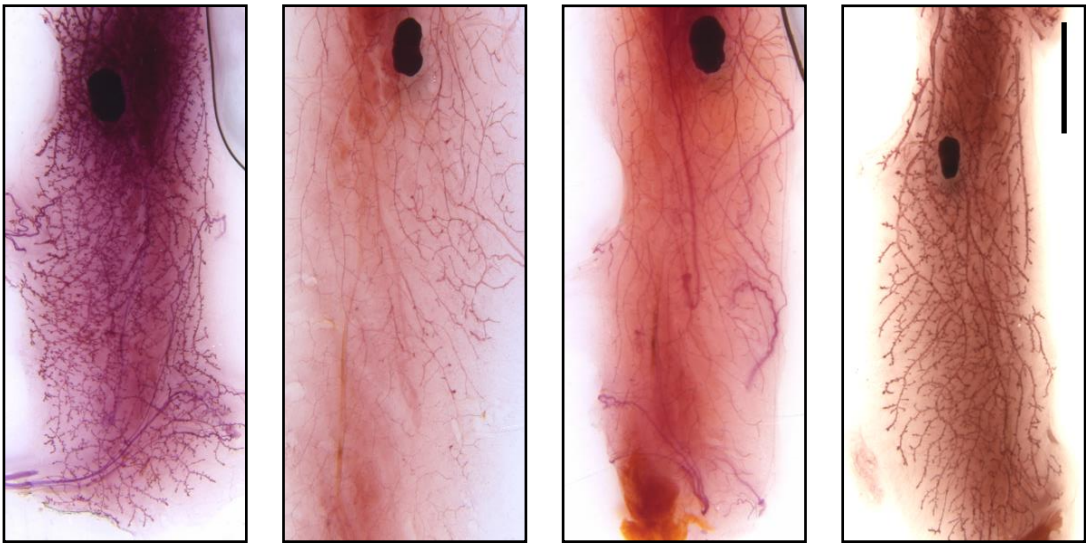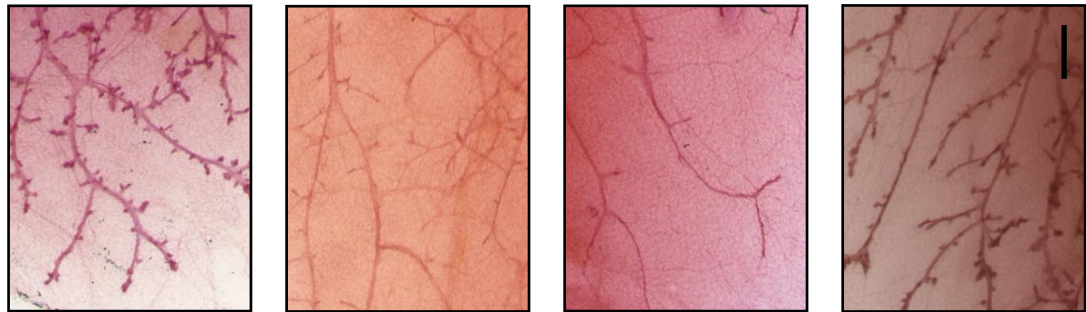

rTA (-Dox)

rTA (+Dox)

MIC (-Dox)

MIC (+Dox)

**B**

**A**

Supplement: MOESM14 [file 9703970]
